# Supplementary material for: Versatile oxalato-bridging modes: a novel three-dimensional framework structure of manganese(ii) oxalate complex [MnC2O4]·0.5H2O and the relationship with other manganese(ii) oxalates
Source: Royal Society of Chemistry journal article supplement (doi:10.1039/d0dt03765f), 2020-12-10
Supplement: d0dt03765f1.pdf [file d0dt03765f1.pdf]

## Supporting Information

Versatile oxalato-bridging modes: a novel three-dimensional framework structure of manganese(II) oxalate complex  $[\text{MnC}_2\text{O}_4]\cdot 0.5\text{H}_2\text{O}$  and the relationship with other manganese(II) oxalates

Wen-Yuan Wu,\* Tie-Huan Tang, Yi Li and Shuang Xu

*College of Chemistry and Molecular Engineering, Nanjing Tech University, Nanjing 211800, China*

\* Corresponding e-mail: [wwy@njtech.edu.cn](mailto:wwy@njtech.edu.cn)

## Contents

1. Materials and instrumental
2. Synthesis of complex  $[\text{MnC}_2\text{O}_4]\cdot 0.5\text{H}_2\text{O}$  (**1**)
3. Crystallography for complex **1**
4. Powder X-ray diffraction study of  $[\text{MnC}_2\text{O}_4]\cdot 0.5\text{H}_2\text{O}$  (**1**) and  $\alpha\text{-MnC}_2\text{O}_4$  (**2**)
5. Thermal behaviors of manganese(II) oxalates **1** & **2**
6. Magnetic behaviors of manganese(II) oxalates **1** & **2**

## 1. Materials and instrumental

Unless otherwise specified, all starting materials were purchased from commercial sources and used as supplied. Manipulations were performed under normal atmospheric conditions unless otherwise noted. Thermo gravimetric analyses (TGA) and differential thermal analyses (DTA) were performed on a SDT thermal analyzer under a flowing atmosphere or nitrogen atmosphere with the rate of 100-150 mL / min. The heating temperature ranges from room temperature to 600 °C at the heating rate of 10 °C/min. The XRD analysis was carried out with a Simens powder diffractometer using Cu  $K\alpha$  radiation ( $\lambda = 1.54056 \text{ \AA}$ ). The  $2\theta$  ranges are set within 5-80 ° with a step of 0.02 °. The identification of the phases was realized by comparing the experimental XRD powder patterns to the JCPDS standard data. For single XRD measurement, data were collected at room temperature on a Bruker Smart APEX CCD diffractometer, using graphite monochromated Mo- $K\alpha$  radiation ( $\lambda=0.71073\text{\AA}$ ). Magnetic susceptibilities  $\chi$  were measured on a SQUID magnetometer (Quantum Design, MPMS) between 1.8 and 300 K in an applied field of 2000 Oe. Specific heat  $C_p$  was recorded between 2 and 30 K by a pulse relaxation method using a commercial calorimeter (Quantum Design PPMS).

## 2. Synthesis of complex $[\text{MnC}_2\text{O}_4]\cdot 0.5\text{H}_2\text{O}$ (1).

A mixture of  $\text{Mn}(\text{OAc})\cdot 4\text{H}_2\text{O}$  (0.2451g, 1 mmol), malonic acid (0.2081g, 2 mmol),  $\text{H}_2\text{C}_2\text{O}_4\cdot 2\text{H}_2\text{O}$  (0.1261g, 1 mmol) and distilled water (15 mL) was heated at the temperature of 150°C for 3 days in a 23 mL Teflon-lined autoclave. The starting pH value of the solution was 2, while the final pH was 4 after the hydrothermal treatment. After being washed by distilled water and then anhydrous acetone, the insoluble pink crystals were collected by filtration and then dried in the air. The final product (Yield 90.0 mg, 59 %) was proved to be single phase by the judgments of element analysis and X-ray powder diffraction determination (Found: C, 15.95 wt%; H 0.60 wt%. Calcd: C 15.81 wt%; H 0.66 wt%). IR (KBr pellet,  $\text{cm}^{-1}$ ): 3418(board), 1638(strong), 1320(strong), 790(strong), 518(moderate).

### 3. Crystallography for **1**

Crystals of **1** with the shape of hexangular plate were manually picked out for single crystal structural determination. Data were collected at room temperature on a Bruker Smart APEX CCD diffractometer, using graphite monochromated Mo-K $\alpha$  radiation ( $\lambda=0.71073\text{\AA}$ ). Empirical correction based on symmetry equivalent reflections was applied to collected data by using the SADABS program. 2019 reflections were collected with 454 data unique. Structure was solved by direct method and refined by least-squares method on  $F^2$ . All non-hydrogen atoms were refined anisotropically. Hydrogen atoms in water molecules were placed in calculated positions and refined as riding atoms. Final R values:  $R_1=0.0359$  for all data and  $wR_2=0.0981$  for 416 reflections with  $I>2\sigma$ . CCDC-2024513 contains full supplementary crystallographic data.

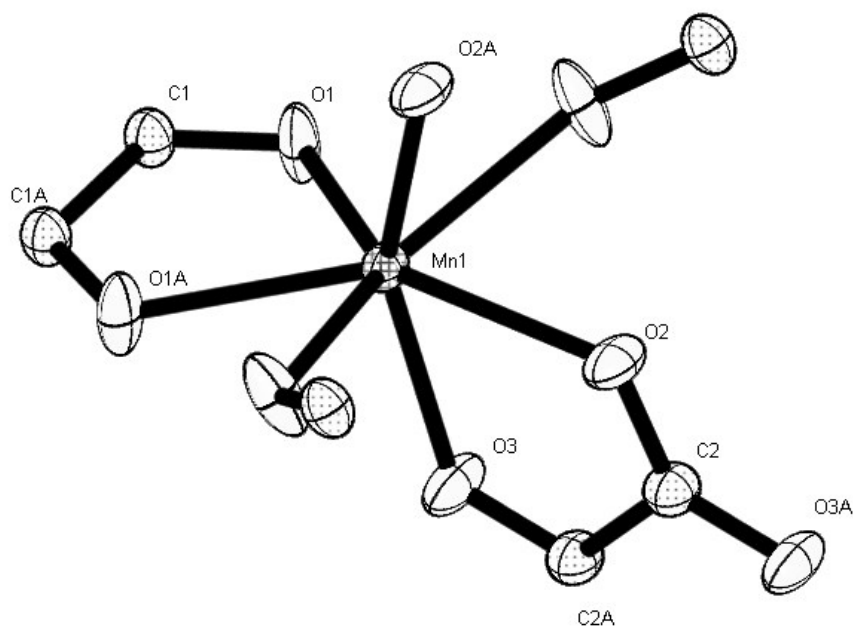

**Figure S1.** The coordination environment of Mn atom in **1**, showing the unusual seven-coordinated mode. Thermal ellipsoids are set at 50% probability. C2, C2A, O2, O2A, O3 and O3A are from interlayer oxalates, while others are from layer structure.

**Table S1.** Hydrogen bond lengths ( $\text{\AA}$ ) and angle ( $^\circ$ ) for  $[\text{MnC}_2\text{O}_4]\cdot 0.5\text{H}_2\text{O}$  (**1**)

| D-H...A    | D-H  | H...A | D...A    | $\angle$ D-H...A |
|------------|------|-------|----------|------------------|
| O4-H1...O1 | 0.85 | 2.30  | 3.134(3) | 167              |

## 4. Powder X-ray diffraction study of manganese(II) oxalates

### 1 & 2

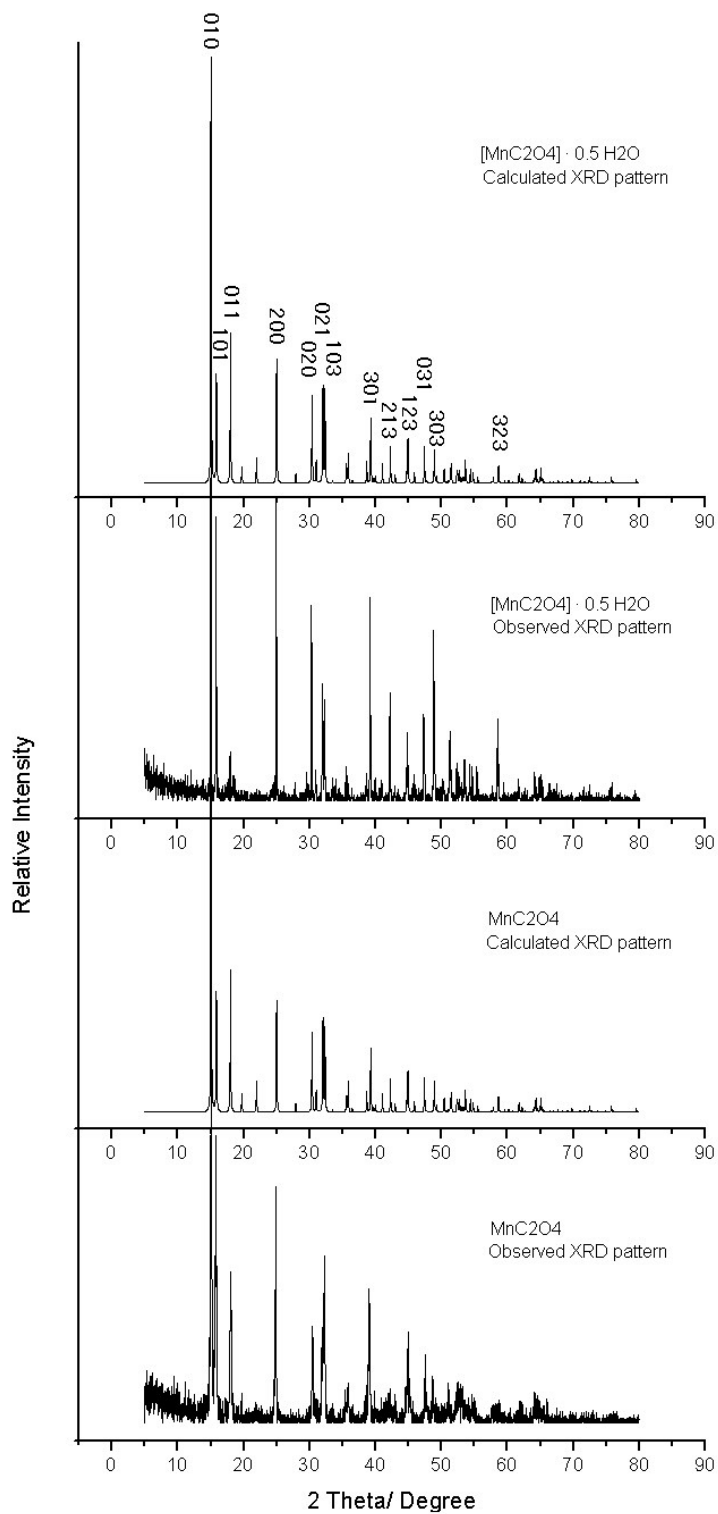

**Figure S2.** Calculated and observed XRD powder patterns for  $[\text{MnC}_2\text{O}_4] \cdot 0.5\text{H}_2\text{O}$  (1) and  $\alpha\text{-MnC}_2\text{O}_4$  (2).

## 5. Thermal behaviors of manganese(II) oxalates 1 & 2

### 5.1 $[\text{MnC}_2\text{O}_4]\cdot 0.5\text{H}_2\text{O}$ (1)

Under the atmosphere of flowing air (Figure S3a), the dehydration of **1** started at 110 °C and continued until 140 °C, with endothermic peak at 130 °C. The total weight loss at 200 °C was 6.08 %, which meets the theoretical one of 5.92 %. The second stage of weight loss caused by decomposition and oxidation started at 220 °C and did not end until 480 °C. There were two exothermic peaks during the second stage. The main peak occurred at 391 °C, while the much smaller peak at 319 °C. The final weight loss at 500 °C was 57.40 %, which is close to the calculated value of an expected product for MnO (53.32 %).

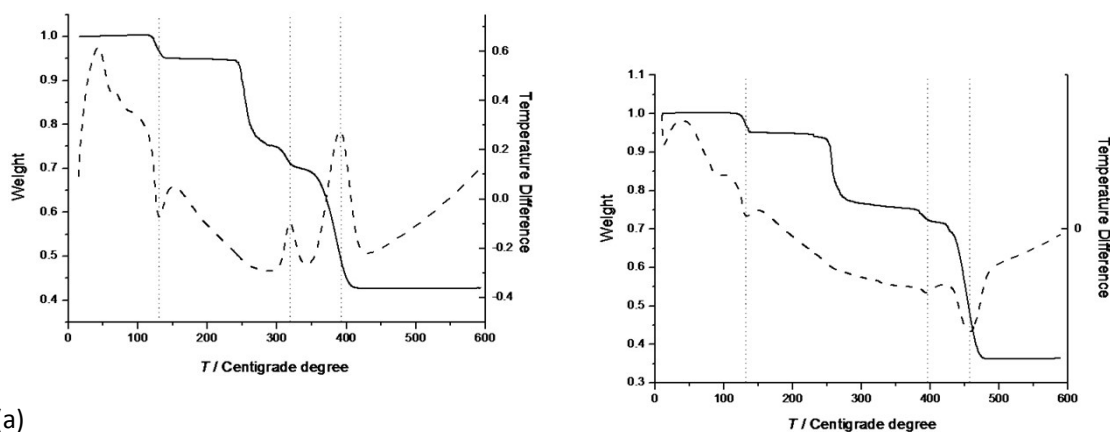

**Figure S3.** (a) TGA (solid line) and DTA (dash line) curves for **1** under the atmosphere of air; (b) under the atmosphere of nitrogen.

Under the atmosphere of flowing nitrogen (Figure S3b), the dehydration of **1** started at 115 °C and continued until 135 °C, with endothermic peak at 131 °C. The total weight loss at 200 °C was 6.03 %, which meets the theoretical one of 5.92 %. The second stage of weight loss caused by decomposition started at 220 °C and did not end until 480 °C. There were two endothermic peaks during the second stage. The main peak occurred at 457 °C, while the much smaller peak at 395 °C. The final weight loss at 500 °C was 63.84 %, which is identical with the calculated value of an expected product for metal Mn (63.85 %).

There is no obvious difference in the dehydration stage between the two atmospheres. However the endothermic peaks under the atmosphere of nitrogen occur

at higher temperatures than the exothermal peaks under the atmosphere of air, where an oxidation course is obviously involved.

## 5.2 $\alpha$ - $\text{MnC}_2\text{O}_4$ (2)

Under the atmosphere of flowing air (Figure S4a), the total weight loss for **2** at 200 °C was 1.51 %, which shows the slight water adsorption of the sample. The decomposition and oxidation stage started at 265 °C and did not end until 345 °C, where is an exothermal peaks at 310 °C. Also there is another much smaller exothermal peak at 460 °C, which results minor weights lose (about 1 % in total weight). The final weight loss at 500 °C was 48.28 %, which is between the calculated values of an expected product for  $\text{Mn}_3\text{O}_4$  (46.65 %) and for  $\text{MnO}$  (50.38 %).

Under the atmosphere of flowing nitrogen (Figure S4b), the total weight loss for **2** at 200 °C was 1.66 %, which also shows the slight water adsorption of the sample. The decomposition stage starts at 320 °C and did not end until 435 °C. There is an endothermal peak at 412 °C. The final weight loss at 500 °C was 49.89 %, which is close to the calculated value of an expected product for  $\text{MnO}$  (50.38 %).

$\alpha$ - $\text{MnC}_2\text{O}_4$  seems to be more stable in the nitrogen than in the air. In the latter situation, it begins to decompose at the temperature of 320 °C and absorbs heat from environment, while in the former it starts to decompose at 265 °C and releases heat to environment where an oxidation course is obviously involved.

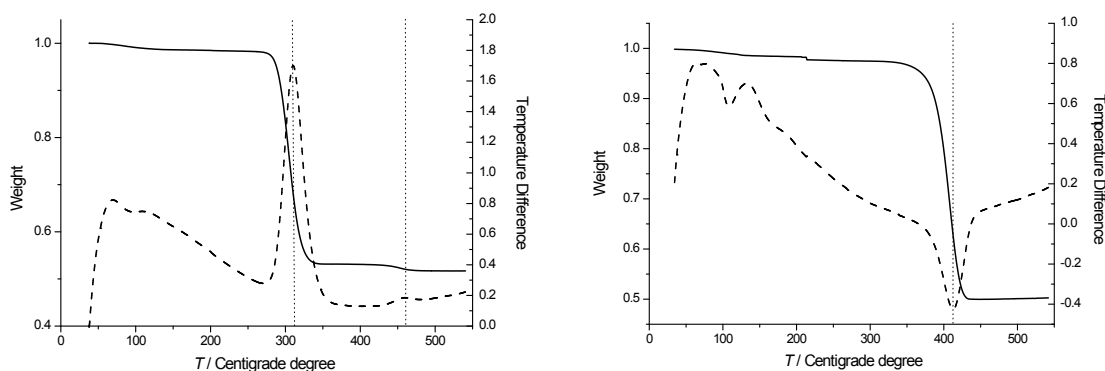

(a)

(b)

**Figure S4.** (a) TGA (solid line) and DTA (dash line) curves for **2** under the atmosphere of air; (b) under the atmosphere of nitrogen.

**Table S2.** Calculated weight loss (%) of the manganese(II) oxalates **1** & **2**

| Compound (FW)     | Mn <sub>2</sub> O <sub>3</sub> (157.87) | Mn <sub>3</sub> O <sub>4</sub> (228.81) | MnO (70.94) | Mn (54.94) |
|-------------------|-----------------------------------------|-----------------------------------------|-------------|------------|
| <b>1</b> (142.96) | 44.79                                   | 46.65                                   | 50.38       | 61.57      |
| <b>2</b> (151.97) | 48.06                                   | 49.81                                   | 53.32       | 63.85      |

### 5.3 Isothermal annealing of manganese(II) oxalates **1**

According to the TGA and DTA results, the decomposition occurs in the temperature range between 220 and 480 °C. So the isothermal temperature is set at 500 °C, when the sample of **1** was annealed in the air for 1 hour. The final product was determined on the basis of the X-ray powder patterns (JCPDS 24-0734 for Mn<sub>3</sub>O<sub>4</sub> and JCPDS 41-1442 for  $\alpha$ -Mn<sub>2</sub>O<sub>3</sub>).

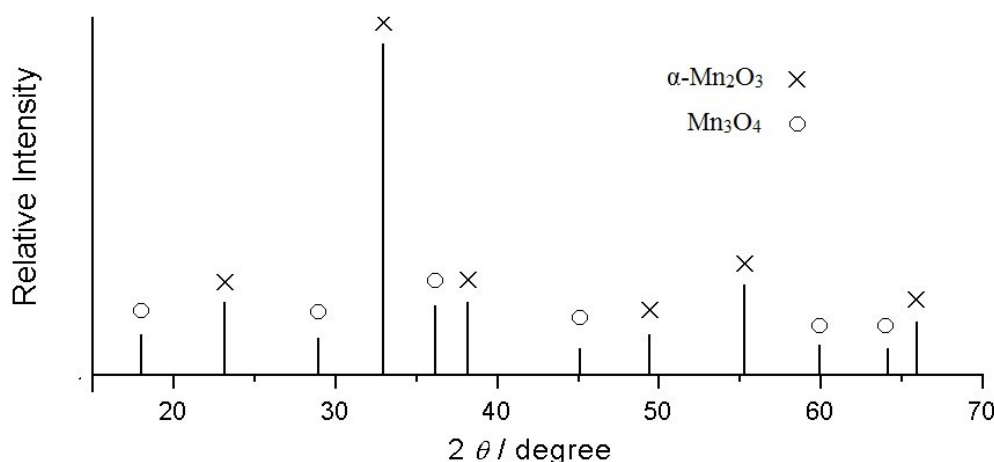**Figure S5.** The X-ray powder pattern showing the phase composition of the thermal annealing product for **1**.

## 6. Magnetic behaviors of manganese(II) oxalates **1** & **2**

### 6.1 [MnC<sub>2</sub>O<sub>4</sub>] $\cdot$ 0.5H<sub>2</sub>O (**1**)

Variable-temperature magnetic susceptibility of **1** was measured on powdered sample from 300 to 1.8 K, showing the typical antiferromagnetic interaction between Mn<sup>II</sup> ions (Figure S6). The  $\chi_M$  value increases continuously upon cooling, reaching the sharp maximum of 0.0823 cm<sup>3</sup> mol<sup>-1</sup> around 14 K, then decreases to 0.0662 cm<sup>3</sup> mol<sup>-1</sup> at 1.8 K. The  $\chi_M T$  value drops all along the cooling course and the effective magnetic moment per Mn<sup>II</sup> ion, 5.83  $\mu_B$ , calculated from  $\chi_M T$  value at 300 K is somewhat

smaller than the spin-only value ( $5.92 \mu_B$ ) expected for a high spin configuration ( $S = 5/2$ ), which also shows the existence of antiferromagnetic coupling. The magnetic susceptibility of **1** above 30 K is fitted well with the Curie-Weiss law, giving the parameters of  $C = 4.75 \text{ cm}^3 \text{ K mol}^{-1}$  and  $\theta = -34.77 \text{ K}$ . Néel temperature is determined by the specific heat measurement that exhibits a sharp peak at  $11.2(1) \text{ K}$  (Figure S7).

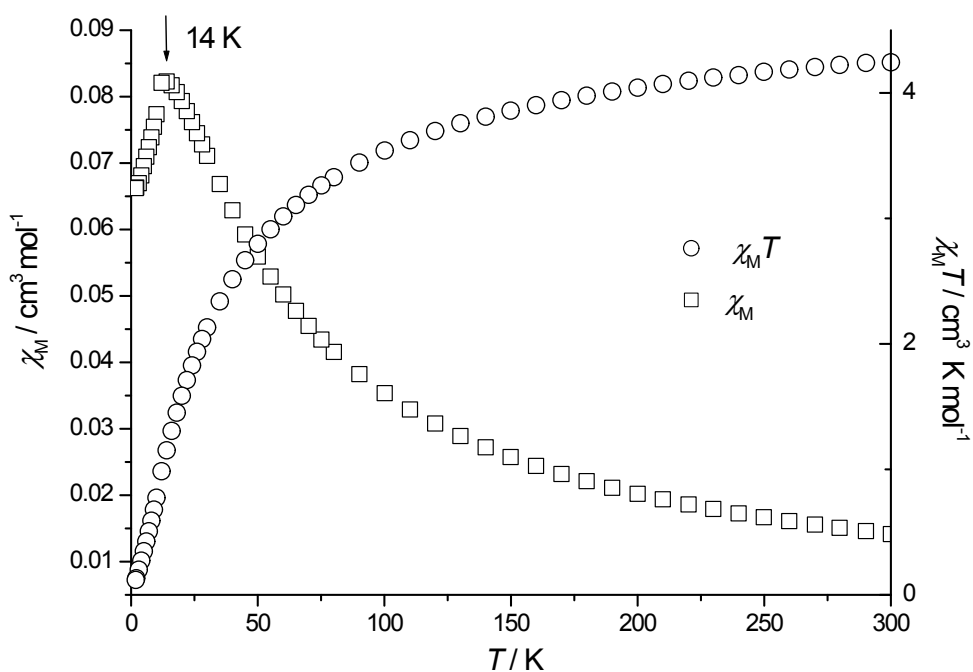

**Figure S6.** Thermal variations of  $\chi_M T$  and  $\chi_M$  for **1**.



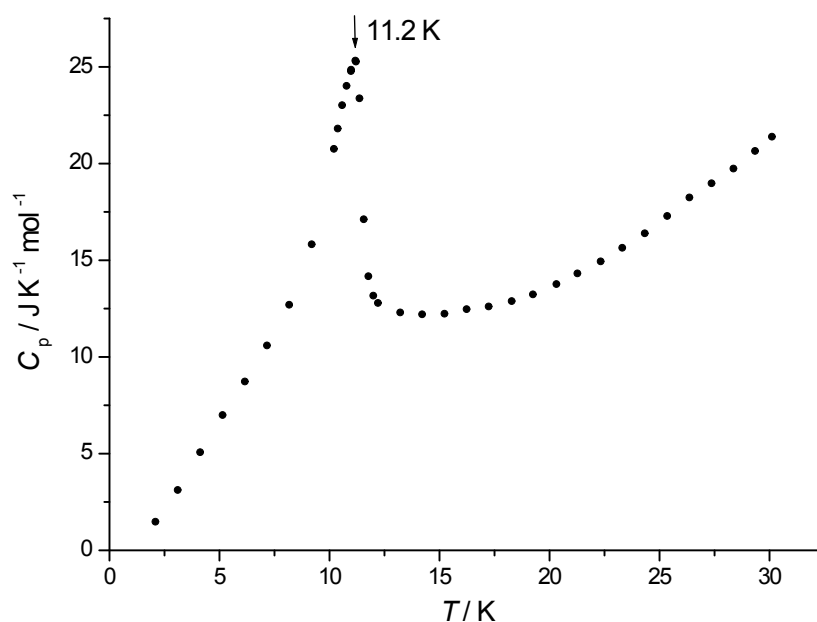

**Figure S7.** Specific heat  $C_p$  plotted against temperature shows a peak at  $T_N = 11.2(1)$  K for **1**

## 6.2 $\alpha$ -MnC<sub>2</sub>O<sub>4</sub> (**2**)

Variable-temperature magnetic susceptibility of **2** was measured on powdered sample from 300 to 1.8 K, showing the typical antiferromagnetic interaction between Mn<sup>II</sup> ions (Figure S8). The  $\chi_M$  value increases continuously upon cooling, reaching the sharp maximum of 0.0756 cm<sup>3</sup> mol<sup>-1</sup> around 14 K, then decreases to 0.0630 cm<sup>3</sup> mol<sup>-1</sup> at 1.8 K. The  $\chi_M T$  value drops all along the cooling course and the effective magnetic moment per Mn<sup>II</sup> ion, 5.61  $\mu_B$ , calculated from  $\chi_M T$  value at 300 K is somewhat smaller than the spin-only value (5.92  $\mu_B$ ) expected for a high spin configuration ( $S = 5/2$ ), which also shows the existence of antiferromagnetic coupling. The magnetic

susceptibility of **2** above 30 K is fitted well with the Curie-Weiss law, giving the parameters of  $C = 4.38 \text{ cm}^3 \text{ K mol}^{-1}$  and  $\theta = -32.27 \text{ K}$ . Néel temperature is determined by the specific heat measurement that exhibits a sharp peak at  $9.9(2) \text{ K}$  (Figure S9).

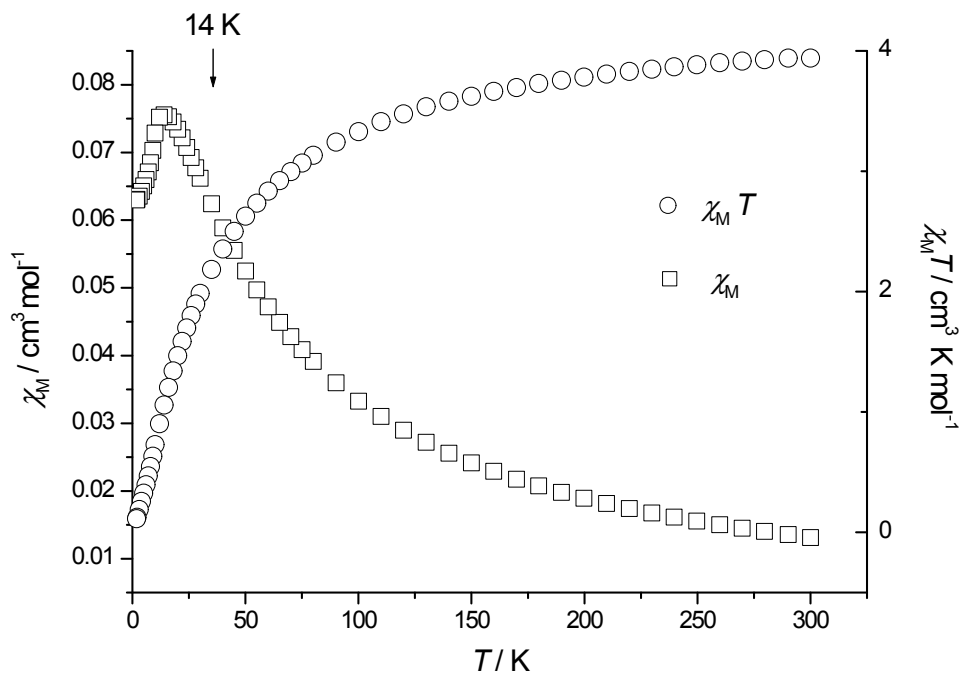

**Figure S8.** Thermal variations of  $\chi_M T$  and  $\chi_M$  for **2**.

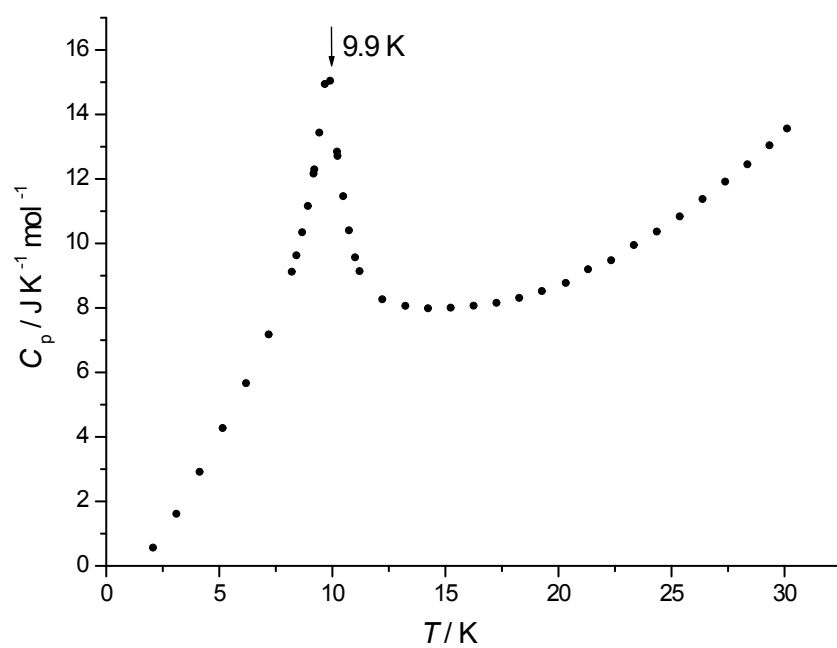

**Figure S9.** Specific heat  $C_p$  plotted against temperature shows a peak at  $T_N = 9.9(2)$  K for **2**.
